# Supplementary material
Source: publisher site journal article supplement (https://www.spandidos-publications.com/6422/downloadSupplementary)

Figure S2. Venn diagram of two DEG-sets identified using DEseq2 and edgeR to show common and uncommon genes with log<sub>2</sub>FC value >1 with an adjusted P-value <0.05 for the two analysis tools. DEG, differentially expressed gene.

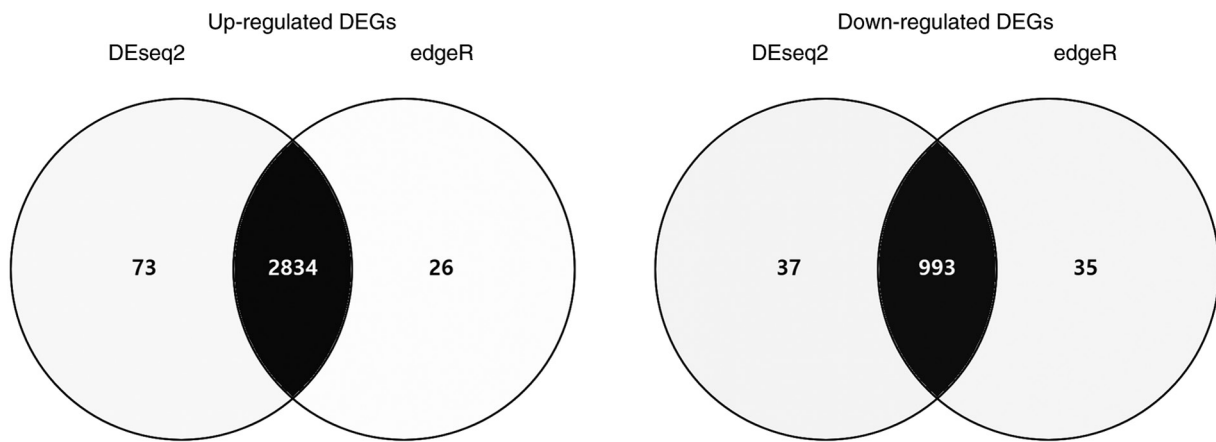

Supplement: Supplementary file 1 [file downloadSupplementary]
